# Supplementary material for: The Representation of Roma in the Romanian Media During COVID-19: Performing Control Through Discursive-Performative Repertoires
Source: Frontiers journal article supplement (doi:10.3389/fpos.2021.663874), 2021-06-07
Supplement: Data_Sheet_8.PDF [file Data_Sheet_8.PDF]

Roma activists after Bolintin Vale Police Chief hit a man lying on the ground: "It is known that some of the police officers are aggressive towards Roma, even minors"

Several Roma activists had a discussion with representatives of the Police, this morning, a day after the scandalous images appeared in which the police chief from Bolintin Vale brutally hits a Roma lying on the ground, already immobilized. They received assurances that law enforcement would take action.

Farmers in Țândărei are desperate: "We are losing crops, it is a crime that is happening"

It is sowing time for corn, sunflower and soybeans, and the period ends soon, around May 10th. However, the owners of agricultural land or those who rented land near the town of Țândărei cannot work on them, due to the quarantine established in the locality, but also due to the lack of reaction of the authorities.

Ambulance at Țândărei Hospital, closed after four medical staff were confirmed with coronavirus

The ambulance inside the Țândărei City Hospital was closed after four medical staff were confirmed with coronavirus. Also, 12 other employees, ambulances and nurses, are waiting for the test results.

Arsenal of weapons were discovered in the outbreak in Țândărei. Deutsche Welle: AK-47 assault rifles seized from underworld clans ten years ago

The city of Țândărei is in full quarantine, after it became an outbreak of infection, given that hundreds of locals returning to the country did not comply with the isolation measures. Here, the police confiscated 11 lethal and 2 non-lethal weapons following a large-scale raid, carried out this weekend, according to the Independent newspaper.

Roma children from Românești, Dâmbovița, long for lessons, for teachers and for colleagues: "We miss school!"

In one of the disadvantaged villages of Dâmbovița, an association is trying to make life easier for Roma families living here. Volunteers distribute packages of hygiene products, seek to keep the little ones busy with educational activities, in addition to household chores, and adults who do not know how to write, give statements on their own responsibility ready printed.

IMAGES OF A MILITARY JUNTA. How the Romanian Police punishes a group of men from Bolintin?

Roma lying on the floor with their hands behind their backs and beaten. Explanations of IPJ Giurgiu. An incident started by a group of men who was caught grilling in front of the court turned into a revenge of the police.

The city of Țândărei came out of quarantine after almost five weeks

The Minister of Internal Affairs announced the lifting of the quarantine in Țândărei, a city that was closed on April 4 due to the COVID-19 crisis.

What is provided by the Military Ordinance number 7. The city of Țândărei closes and the flights to the red zones are canceled

The Minister of Interior, Marcel Vela, announced on Saturday the Military Ordinance number 7, which enters into force as soon as it will be published in the Official Gazette. Find the full text of the document at the end of the article.

CFR Călători announces special measures for Țândărei. Who receives travel tickets?

CFR Călători will not issue travel tickets for the city of Țândărei, except for a certain category of people such as those who carry out economic activities in the area, but also for medical staff or those in the field of national defense.

Five of the 30 Roma from Ploiești, suspected of COVID-19, are ill. The healthy are still guarded by police, gendarmes and the military

Five Roma people out of the approximately 30 living in the same yard, in Ploiești, were diagnosed with the new coronavirus. Three are children, aged 10, 14 and 15, and two are adults. They are all asymptomatic.

Who are the "Diaspora" and the "Roma" presented as the "Wild West that attacks gendarmes at Teliu"? Two men from a community of 2,000: one 33 and the other 17 years old

"Mini anarchy in Brașov" in the midst of the COVID crisis, "The Roma attacked the gendarmes", "The Wild West begins. Gendarmes attacked at Teliu!", "People returning from Europe revolted and attacked the gendarmes".

These are some of the headlines in the press about a conflict that took place on Monday, April 13, between members of the Roma community from Teliu and police and gendarmes from Brașov County. Prosecutors say something else entirely: there are two suspects, a 33-year-old man and a 17-year-old kid. And those who asked for food are not from the Diaspora, but locals who worked during the day, lost their jobs due to the pandemic, confirms the deputy mayor of Teliu.

Țândăreiul is in quarantine, but Ialomița County Council puts 1,000,000 euros in an "administrative villa" on the shores of Lake Amara. "Why stop the project?"

Victor Moraru, the president of the Ialomița County Council, allocates 5,000,000 lei, respectively over 1,000,000 euros, from the public money for the construction of a three-storey building and six apartments on the shores of Lake Amara, revealed [infoialomita.ro](http://infoialomita.ro).

A 10-year-old child left behind the wheel of the car by his father. Everything happened in Țândărei

A 10-year-old minor was caught driving a car on the streets of Țândărei, and the police discovered that the car had been entrusted to him by his father, who was sitting on the right.

A commune from Dâmbovița avoided Țândărei's scenario, after she was overwhelmed by the coronavirus. "There were hard days when I barely had bread"

Corbii Mari commune in the south of Dâmbovița county, located 52 kilometers from the Capital, was hit hard by COVID-19. Almost 300 of the 8,000 inhabitants of the commune entered isolation, after three people died and another 20 were infected. Almost a month later, people begin to breathe a sigh of relief.

As Vladimir Tismăneanu explained the racist post with "the crows from Țândărei": "They wanted to be funny. I had not understood its racist implications. "

Political scientist Vladimir Tismăneanu deleted the racist post that generated a harsh reaction from activist Ciprian Necula, a few minutes after its publication. Shortly afterwards, Tismăneanu also offered an explanation, saying that it was "an error".

How the case of Țândărei was speculated and distorted

The message of the mayor of Țândărei to the media: "the media pressure on the ethnicity of some inhabitants of the locality is not beneficial for anyone"

How father and daughter came to be sixth-grade classmates, and the wisdom of Roma people learned through ongoing discrimination

The Roma who lost their homes after the landslide in Azuga spent Easter together at the "Mr. Vlad" boarding house, where they have been staying for over a week. Material, they have nothing left, but they have each other. "And God," they say.

Dan Negru: "The Romanian state closed its eyes when dozens of children from Țândărei were trafficked to Europe"

The decision of the authorities to quarantine the town of Țândărei due to the large number of people infected with Covid-19 and the number of deaths registered there, reminded Dan Negru of a sad episode, in which the protagonists were the children of the people from this locality.

Death 332 in Romania due to coronavirus: a nurse from Țândărei, confirmed with COVID-19 on April 2

A nurse from Țândărei died yesterday, April 13, the Strategic Communication Group informed. This is the 332th death in Romania due to coronavirus infection

The director of Humanitas Fiction says that she did not realize the racist substratum of the image with the "crows from Țândărei": "We linked her to our cloistering situation"

The director of the Humanitas Fiction Publishing House, Denisa Comănescu, apologized on Facebook following the scandal caused by the racist image she sent to Vladimir Tismăneanu and which he posted online yesterday

Digi 24 was accused by CNA for "relating the news content to the ethnic presentation of the quarantine case in Țândărei"

The Aresel platform, which groups anti-discrimination initiatives, filed a complaint with the NAC because Digi 24 made the situation in Țândărei a story based on the Roma ethnicity of the inhabitants there.

Ialomița County Inspectorate of Gendarmes: «Two young people from Țândărei tried to break the quarantine to go to the meeting»

Two young people from Țândărei, aged 19 and 20, wanted to leave the city, although he is in quarantine, to go to the meeting, but they were caught by the gendarmes on a side road, news.ro reported.

Soros Foundation, worrying report on the impact of the pandemic on Roma communities in Europe: "Disaster will deepen interethnic conflict to unprecedented levels in the last three decades"

An Open Society analysis of Roma communities in six European countries - Bulgaria, Hungary, Italy, Romania, Slovakia and Spain - shows that the way states manage the problems of this minority during the global health crisis risks turning a bad situation into a catastrophe ”.

Images of solidarity in Țândărei, where over 150 families received packages of hygiene products and food

Over 400 people from Țândărei received hundreds of food and hygiene packages yesterday in a caravan organized by Geeks for Democracy.

In the "Țândărei case", the judges point the finger at DIICOT: out of 224 minors, the prosecutors identified 74 and turned all the victims of trafficking into witnesses!

The failure in the Țândărei case, where 25 child traffickers were acquitted, is mentioned in the US State Department's Report on Trafficking in Persons. The Târgu Mureș Court of Appeal, which ruled in December 2019 on the final acquittal decision, states today that DIICOT prosecutors should assume this failure.

Nine NGOs are urging solidarity with the Roma during the coronavirus. "the Roma Community is the target of discrimination"

April 8 marks International Roma Day, and representatives of several civic associations are sounding the alarm that, in the midst of the pandemic, the Roma community is the target of discriminatory virulent attacks by people and authorities. Roma are seen as a source of contamination with the new virus.

Klaus Iohannis, Roma Day message: We have a responsibility to eliminate the causes of their social marginalization

President Klaus Iohannis sent a message on Wednesday on the occasion of the International Roma Day stating that Romanian society needs proof of solidarity and responsibility of every citizen, regardless of ethnicity to limit the negative effects of the coronavirus epidemic.

The inhabitants of Țândărei, guarded by the Army. 800 people returning from abroad do not respect isolation

The situation in Țândărei, Ialomița County, is getting worse day by day. The outbreak of the new coronavirus infection left another victim on Friday, and authorities called on the army to guard those who do not respect isolation.

Messages from the leaders of the Roma Party after the violence of the last days: "Party Roma brothers, stop!"

Nicolae Păun, the president of the Pro-Europe Roma Party, and the first vice-president Cătălin Manea Zamfir broadcast public messages to the Roma ethnics in the country, in the context of the violence of the last days.

Messages from the leaders of the Roma Party after the violence of the last days: "Party Roma brothers, stop!"

Nicolae Păun, the president of the Pro-Europe Roma Party, and the first vice-president Cătălin Manea Zamfir broadcast public messages to the Roma ethnics in the country, in the context of the violence of the last days.

Motivation of the judges in Țândăra's case: There was no direct evidence from which the guilt of the defendants would undoubtedly result.

The judges of the Târgu Mureș Court of Appeal show that the joint investigation teams did not obtain clear evidence from the fact that the defendants in Țândărei's case were recruiting and transporting Roma children to Western Europe for exploitation. The judges specify that convictions could not be made "under media pressure", Mediafax reports.

The city of Țândărei, in total quarantine. "We will only allow the transport of goods and the supply of the population"

The Minister of Internal Affairs, Marcel Vela, announced that the city of Țândărei is in full quarantine, according to the Military Ordinance number 7. The decision was taken following the large number of infected people and deaths registered in the locality.

The Roma community in Sibiu is on the alert: the 81th patient killed by coronavirus was their leader. King Cioaba appeals to the authorities. "Please don't leave them alone!"

Gogu Mihailescu, an important Roma leader, died infected with COVID-19 on Monday night, but the Strategic Communication Group announced it 24 hours later. His wife also died from the virus, confirmed on the same day, much faster. The woman was the 51st death in Romania, the man, the 81st.

The prefect of Timiș, about the student with coronavirus: "It could have been positive from another environment as well. I understand that he is also from a Roma family "

The prefect of Timiș, Liliana Oneț, linked the infection of the student from Timișoara with coronavirus to the fact that the student was of Roma ethnicity. In a telephone conversation with the general school inspector of Timiș County, Aura Danielescu, the prefect of Timiș specified that the student could be positive from another environment as well. "I understand that he is also from a Roma family."

Military Ordinance 7. The city of Țândărei is in full quarantine. Flights to and from the red zones are suspended

Authorities on Saturday announced the quarantine of the city of Tandara and the cessation of flights to and from Austria, Switzerland, Belgium, the United States, the United Kingdom, the Netherlands, Turkey and Iran for 14 days.

The volunteer who brings bread to the Roma from a poor neighborhood, threatened by the mayor. "There are some smart people who want to take advantage, to get out of the house 50 times a day"

During this period, when the course of the world has slowed down, we have time to look at those we have left behind. For example, to the Roma communities, which are invariably, both literally and figuratively, on the outskirts of our villages and towns.

Anti-Roma racism grows alongside populist voices during the COVID-19 pandemic and endangers us all

Margareta Matache is the director of the Roma study program at Harvard University and one of the most famous Roma activists in Romania and in the world, being quoted by publications such as The New York Times, Al Jazeera, Le Monde or Le Figaro.

Racism at the heart of European democracy. Police violence is not the solution to Roma problems, but access to water, electricity, gas, health, education. Equal chances.

On Saturday, the European Parliament is the heart of European democracy. It is the guarantor of fundamental rights. And yet, it has MEPs who move away, through their attitude, deeds and words, from the ideals that govern the European Union, ideals of unity, solidarity and harmony between the countries and citizens of Europe.

Today's wickedness empties us of tomorrow's goodness The call of a councilor from the European Parliament, after the scandals in the poor Roma communities

Marius Tudor, political adviser to the European Parliament in the Committee on Civil Liberties, Justice and Home Affairs, writes in Libertatea about the lack of opportunity in Roma communities and the difference that state involvement can make in changing the destiny of the poorest in society.

Chronicle of collective deaths neglected in the private dialysis network Diaverum. 8 deaths, more than in the Țândărei outbreak

On Friday, April 3, a 70-year-old woman was discovered in the Giulești neighborhood who died alone in the house, infected with COVID-19. "My mother was on dialysis at the Diaverum clinic in Sema Park," her daughter, from Germany, told Libertatea. The family found out that she was positive, only on Friday, after her death, because then the Diaverum network announced the housekeeper who found the lifeless woman in the apartment! He is the eighth dead patient of this private clinic.

Roma slavery: a moral problem of our society

"Gypsies can only be born slaves; any child born to a slave mother also becomes a slave (...)" - the Wallachian code, the beginning of the 19th century.

The Roma have been ready to emancipate themselves for 164 years. What is the government doing? Who are the real profiteers of their modern slavery

In the midst of the COVID-19 pandemic, Romania is facing a major opportunity, says Roma rights activist Ciprian Necula. In an editorial published in Libertatea, Necula launches a historic challenge to the Romanian Government and society: the completion of the Roma emancipation process that began more than 150 years ago. A decision that could solve the labor crisis in Romania and would bring benefits of billions of euros annually, he believes, citing international reports.

Scandal between Roma clans in Iasi: "We were going to swear at church." What the police say?

In a recording posted on the Facebook group "You are from Iași if ...", you can see several Roma who have something to share in the area of Piața Chirilă, in the Tătărași neighborhood. According to Bună Ziua Iași, on Tuesday, June 30, around 12.30, dozens of people started a scandal in the middle of the street, at a rush hour.

Scandal stopped with difficulty by the police between two Roma families from Ploiești. Nine people were detained

Law enforcement intervened on Tuesday evening in Ploiesti to resolve a conflict between members of two Roma families who were aggressing each other, writes Agerpres.

Țândărei could be in total quarantine due to the coronavirus outbreak

Țândărei could go into total quarantine on Thursday evening, after an outbreak of coronavirus infection broke out in the city. DSP requested quarantine and the County Emergency Situations Committee approved on Thursday. All that remains is to decide, most likely tonight, the Department for Emergency Situations led by Raed Arafat.

Televisions do not talk about Roma doctors, but insist on fined Roma

One of the most well-known activists for equal rights and anti-discrimination activist today stands up against reports in which televisions, but also some newspapers and websites, focus on ethnicity when presenting negative phenomena.

Vladimir Tismăneanu also apologized in English for the post with "the crows from Țândărei"

The University of Maryland professor wrote a new message on Facebook apologizing in English for the "racist, inappropriate and, most importantly, painful meme."

Tismăneanu returned and apologized for the post with "the crows from Țândărei": "I was also the victim of racist attacks"

After initially explaining that the image "was meant to be a funny one and that I didn't understand its racist implications," the political science professor wrote a new Facebook post apologizing and reassuring everyone that he was always located in the anti-racist camp

Tismăneanu, Cărtărescu and the "crows from Țândărei". All flights and all responsibilities are canceled

After a racist outburst, we are invited by two distinguished intellectuals to live in a world we know from politicians: many are ruined, but no one is to blame.

Traian Băsescu, racist statements against the Roma: "Gypsy groups must understand that they cannot be tolerated with their way of life"

Former President Traian Basescu issued a series of racist statements against the Roma minority, which he says he made a deplorable image of the Romanian people. The former head of state proposes to give up "the phantasmagoric term of Roma, they are gypsies".

Traian Băsescu, a new racist statements against the Roma: "Gypsy clans have returned home".

Ciprian Necula: "After the death of Vadim Tudor, an empty space remained". Former President Traian Băsescu today sent a new racist message to the Roma community, saying on Facebook that those who thicken the ranks of criminals in the country are the Roma returned from abroad.

A group of Roma sent to isolation instilled fear in the authorities in Argeș

A group of Roma from Pojorâta village, Argeș county, recently returned from abroad and who were sent home in isolation, frightened the authorities, notes [epitesti.ro](http://epitesti.ro).



Historian Vladimir Tismăneanu was fined 5,000 lei by CNCD for posting with racist connotations about Țândărei

Historian Vladimir Tismaneanu was fined 5,000 lei by the National Council for Combating Discrimination (CNCD), for a post on Facebook with racist connotations. The decision of the CNCD Board of Directors was taken unanimously, G4media reports.

Vladimir Tismaneanu: a racist. How did a Romanian teacher from the USA end up posting photos with the "crows from Țândărei"

Ciprian Necula reacts after an image with crows on a fence, entitled "Țândărei Airport", was posted on Facebook by two intellectuals, Denisa Comănescu, general manager of Humanitas, and Vladimir Tismăneanu, professor of political science at the University of Maryland in United States.
