# Supplementary material for: The Representation of Roma in the Romanian Media During COVID-19: Performing Control Through Discursive-Performative Repertoires
Source: Frontiers journal article supplement (doi:10.3389/fpos.2021.663874), 2021-06-07
Supplement: Data_Sheet_12.PDF [file Data_Sheet_12.PDF]

**Just out of quarantine, the locals from Țândărei want to leave the country: "People want to make money, there's no jobs, there's nothing "**

As soon as they are out of quarantine, the locals from Țândărei make plans to go abroad to work as soon as possible. They told G4Media how difficult it was for them during this period, many of them having no source of income.

"I want to go to England, now on the 16th, if it is possible to fly." I have a little work there ", says one of the locals.

"I'm waiting for the planes to start and I'm gone, I'm not staying here anymore. I want to go to Germany, I have a contract there ", says a young man.

What things should we pay attention to when buying ...

The chase for gifts has begun! Indescribable rush to...

Markets could be reopened. Ludovic Orban: "The reopening ...

"Everyone wants to go abroad, to earn money too, there is no job here, nothing", laments another man in the locality.

"It wasn't good for us, we don't have any more money", complains a taxi driver.

"We want Romania to be free as it was!", A lady expresses her desire.

"It was like a prison. We thank God that he took us out, I prayed for that ", says another, emphasizing how he felt this period.

On the unpaved streets of Ialomita, you see a horse grazing, but also cars worth tens of thousands of euros.

Read also Military Ordinance 11, issued by the Government. The quarantine measures in Țândărei were lifted.

During the quarantine period, the people from Țândărei were confronted not only with the lack of money, but also with the fact that they did not have the opportunity to go to the doctor.

"I couldn't leave the city and I had problems with my elderly parents, they had to do medical check-ups in Fetești", says a lady.

The mayor of the city, Nicoleta Toma, said that many locals lost their jobs because they could not leave the city. "If those from abroad could come here, to work, those from Țândărei could not go to work outside the city", she explained and drew attention to the need for help from the Government, on the economic side.

The city of Țândărei entered total quarantine at the beginning of April. In the locality, there were 65 cases of infection with the new coronavirus and 10 deaths, 4 even in the city, the remaining 6 among those who were in other localities or abroad.

**Alexandru Rafila: "After May 15, we can relax the measures. In areas like Țândărei we will not do that "**

Alexandru Rafila, the president of the Romanian Society of Microbiology, made several clarifications to Digi24 about the moment from which the restriction measures will be able to relax.

**The army intervenes in Țândărei where hundreds of Roma returning from abroad do not respect the isolation. Tataru: Quarantine can also be reached**

The army was sent to Țândărei to control the Roma who had returned from foreign countries and did not respect the rules of isolation. The city of Ialomița has become a real hotbed, and the authorities are afraid that the scenario in Suceava will not be repeated there as well. The Minister of Health, Nelu Tătaru, declared regarding the situation in Țândărei, that "in the context of the local situation, quarantines can be reached".

**The army intervenes in Țândărei where hundreds of Roma returning from abroad do not respect the isolation. Tataru: Quarantine can also be reached**

"Every place is evaluated. There are several small outbreaks. In the context of the local situation, quarantines can also be reached. The local authorities must do what is necessary to keep them in their homes ", said Nelu Tătaru regarding the case in Ialomița.

Read also: Tonița Manea, prefect of Ialomița: "I have convened the Committee for Emergency Situations and I will propose the quarantine of the city of Țândărei"

The County Committee for Emergency Situations approved on Thursday the request of the Public Health Directorate for the city of Țândărei to be quarantined, the proposal being sent to the Department for Emergency Situations, Ialomița Prefecture announced, quoted by Agerpres.

The decision was made due to the large number of cases of coronavirus infection in the last week and contacts of those in isolation.

"We had the meeting of the County Committee for Emergency Situations, where it was proposed to increase the number of law enforcement officers from Țândărei. We approved 6 mixed police patrols plus gendarmes. They do not respect and have not respected from the beginning, not even the minimum recommendations, nor those at local, county or national level. Today I convened the committee again, at 12 o'clock, and I will propose the quarantine of Țândărei city,

considering that there are already 4 dead people. If there are more than 3 cases with an epidemiological link between them, quarantine may be required. They came one by one (no. From abroad), not suddenly. They were taken into the records of DSP, we monitored very carefully, given the specifics of the locality, but if they did not understand to isolate themselves, we ended up in this situation ", said Tonița Manea, prefect of Ialomița county, on România TV.

In Ialomița county, 37 cases of coronavirus infection have been confirmed, 208 people are in quarantine, and 2,429 in self-isolation and are monitored at home.

In one district of the city, called Strachina, four deaths were recorded and it was found that the locals did not comply with the measures imposed by the authorities, leaving the city without any stop. According to Rador, over 800 Roma from Țândărei returned from abroad in the last month and transmitted the new coronavirus to the community.

#### **The HUGE fortune of an underworld clan from Țândărei.**

42 Romanians, members of a clan of thieves from Țândărei, were arrested following an action of the Spanish National Police. The gang of thieves is suspected of theft of over one million euros. Investigators say Romanians were very well organized, with older people training children and women.

Of these, 38 were detained in Spain, three in Romania and one in Portugal, following an investigation that lasted 15 months. Of the detainees, 17 are women.

"Early investigations show that gang members have been operating for a long time, since none of them have ever been hired, while their standard of living was high," the Spanish National Police said.

#### **A man from Țândărei, recovered from COVID 19, goes live on Facebook and announces: "Cut the pig, we do a big feast, I am well!"**

A man from Țândărei, who became famous after performing live at the "Matei Balș" Hospital, says that he has been cured of COVID-19 and that he is preparing "a great feast, with pork and red wine" in ten days, when he hopes to be discharged. Eduard L. was followed by tens of thousands of people three days ago, when he sent on his social media account images in which he seemed in serious condition. The man was wearing a mask and was having difficulty breathing. He urged everyone to stay in their homes and pray to God. On Sunday, the man declared himself healed. He says he feels good and that the isolation is for the "sickest", instead, the strong like him will defeat the virus. Eduard announced to all his friends that when he leaves the hospital he will have a great time and advised them to wait for him with drinks and food.

**The fights between Roma clans that scared Britain. The locals demanded the intervention of the Army**

Scenes of extraordinary violence were captured in the British city of Sheffield. Dozens of people fought on the street, to the horror of the locals who are worried that the social distance measures are not respected. People say the perpetrators are Romanian, but the British authorities have not made public information about the nationality of those involved in the scandal. The fight took place in Page Hall, one of the poorest areas of the British city of Sheffield, after the decline of the steel industry. According to the locals, the scandals have been going on here for some time among the Roma.

**Video - Fighting between Roma clans from Vlaşca, Ialomiţa County. The police intervened**

It was not only in Bucharest and Brasov that there was an Easter scandal. Law enforcement officers also intervened on Sunday in Vlaşca, Ialomiţa County, to settle a conflict between several Roma families. In the images posted on Facebook, you can see several men jumping with clubs and shovels.

**The chieftain from Țândărei, who was acquitted in the case of child traffickers in Great Britain, asks for his gold back**

After the Romanian court finally acquitted them in the case of Țândărei regarding the trafficking of minors, the chieftain and his relatives went to ANAF to recover their money taken by prosecutors during the searches. The audacity goes further, and the defendants will demand moral damages from the ECHR.

**There will be a community of 500 Roma from Vadu Crişului isolated under the protection of the gendarmes, after refusing the coronavirus test**

Almost 500 Roma people from the colony Vadu Crişului refused to have their saliva and nasal secretions collected, in the first community testing action in the country, decided by the Bihor authorities.

**10-year-old child, caught behind the wheel in Țândărei in full swing quarantine from the coronavirus pandemic**

Incredible scenes in the city of Țândăreni, in total quarantine. A ten-year-old boy was caught by police while driving. His father allegedly gave him the car and they went for a walk.

**IGPR announced the detour routes for Țândărei, after establishing the quarantine**

The General Inspectorate of the Romanian Police (IGPR) communicated, on Sunday, the detour routes for the city of Țândărei from Ialomiţa County, after the entry into force of the Military Ordinance no. 7 on measures to prevent Covid-19 which introduces the quarantine in the locality.

**IMAGE OF THE DAY: Dozens of Roma prayed to God, on their knees, on the street, to get rid of the coronavirus. The police fined them**

A video depicting dozens of people gathered in the middle of the street to pray to God went viral on Facebook on Monday.

**Forced intervention of the Timisoara gendarmes in case of Roma families who refused to go to the center of quarantine**

VIDEO The gendarmes from Timisoara intervened in force in the case of a family of gypsies who returned from abroad, who refused to get out of the car once they arrived at the quarantine center.

**Military Ordinance 7 was signed. Marcel Vela: It establishes quarantine in Țândărei**

The Minister of Internal Affairs, Marcel Vela, announced on Saturday that the city of Țândărei in Ialomița County enters quarantine, warning that it is strictly forbidden to leave and enter the locality through other areas than the public ones.

**Military Ordinance 11, issued by the Government. The measures of quarantine in Țândărei were raised**

The Minister of Internal Affairs, Marcel Vela, announced on Monday that the Government issued a new military ordinance - military ordinance no. 11. Among the measures announced by the authorities are the elimination of the air flights ban between Romania and Spain, as well as the lifting of the quarantine measure in , Ialomița county.

**CORONAVIRUS pandemic. The third health care worker was killed by COVID-19. The activity of the Ambulance Service from Țândărei was suspended**

Another doctor died of coronavirus. It is about a nurse from Țândărei. This is the third medical victim of COVID-19.

**Cops beaten with fists, shovels and bottles and threatened with death by a group of Roma whose party was ruined**

A monster scandal took place last weekend, on Șezătorii Street in the Checheci neighborhood of Arad, leaving a beating in full swing. A group of 15-20 Roma people set up a party in the middle of the street, with music and lots of alcohol.

**King Cioaba reacts to the conflicts caused by the Roma: "This distancing is very difficult for the gypsy tents"**

The street conflicts sparked by Roma from several areas of the country, in recent days, have determined King Dorin Cioaba to react. Cioaba condemns their violent behavior and urges them to comply with the measures taken during the state of emergency.

**Roma returned from Germany, forcibly put in quarantine, after they wanted to leave isolation.**

VIDEO Two Roma who violated the provisions of the Military Ordinances, wanting to get out of isolation after they had just returned from Germany, were stopped by law enforcement and forcibly put in a courtyard. The entire scene was filmed by a person inside the courtyard. During the filming, the cries of those stopped by the gendarmes can be clearly heard.

The Roma defied the authorities. Funeral procession in Onești, in full coronavirus pandemic

On Sunday, the Roma community in Onești led one of its family members on its last journey. The event was attended by about 150 people from all over the country.

**The Roma from Balș took to the streets in protest: We want food, I ended up drinking juice**

Fines of 30 thousand lei for violating the military ordinance. Several Roma men from Balș, Olt County, took to the streets to ask the mayor for money to support their families. They filmed everything and posted it on Facebook, which helped the police identify them.

**The Roma from Balș who left their homes because “they have to drink juice”, found and fined by the police**

Roma who took to the streets in Balș, asking for food because they could no longer go to work, fined for forming a group of more than three people

**The Roma from Suceava returned from Italy, lied at customs that they were coming from Germany. "I liken the quarantine period to prison"**

The mayor of Valea Moldovei commune in Suceava announced that 300 Roma from the village of Mironu returned home from Italy, but at the customs they lied that they came from Germany for an astonishing reason. They were afraid that they would be imprisoned because "they liken the quarantine period to prison", said the school inspector for Roma, Lucian Dimitriu.

Scandal in Ialomita, after a man caught without a permit and statement on his own responsibility hid in the court some Roma

The conflicts moved to Bărbulești, Ialomița County, after a man ran away from the police and found refuge in the yard of a Roma family.

Scandal and fight in the street in Satu Mare between police officers and several Roma who did not respect the quarantine

VIDEO Scandal with the police in the middle of the street in Satu Mare! Several people jumped into the fight after law enforcement warned them that they were not allowed to walk the streets in groups.

**The scandals in the Roma communities continue: “I'm leaving to take the ax to hit you in the head ”**

Video Three Roma families from Galati County caused a scandal amid older misunderstandings. Special troops were needed to calm the spirits after the talks degenerated into violent fights. A monster scandal also broke out in Timiș County, where police officers were forced to fire gunfire to calm the spirits.

**Hundreds of Roma returned from Italy in fear of coronavirus. At the customs they lied that they came from Germany**

Hallucinatory situation in a locality from Suceava. 300 Roma returned from Italy for fear of the coronavirus. However, they lied at customs that they came from Germany, so no one checked their health status. The mayor of the locality urgently closed the school.

**Țândărei enters quarantine. The mayor of the city: "It looks like it would be under siege "**

Marcel Vela announced on Saturday that the city of Țândărei in Ialomița County is being quarantined. In a telephone intervention on România TV, the mayor of the city said that the town has been looking under siege for several days and that he expects more and more citizens to return from abroad in the next period.

**Țândărei, the place where people had fun during the coronavirus. Report on unconsciousness and helplessness**

Țândărei is one of the red dots on the map of Romania at the moment. The unconsciousness of the inhabitants and the helplessness of the authorities have turned the place into an outbreak of coronavirus infection, the effects of which we cannot even suspect yet. Țândărei is the subject of a report made by recorder.ro, on the topic of coronavirus.

**Tonița Manea, prefect of Ialomița: "I convened The Emergency Situations Committee and I will propose quarantine of the city of Țândărei "**

The community from Țândărei has already registered four deaths, but nevertheless the inhabitants of the city are not willing to respect the isolation conditions, so the prefect of Ialomița county will propose the quarantine of the entire city on Thursday.

**Traian Băsescu, complained to CNCD for "statements discriminatory and inciting hatred "towards the Roma**

Former President Traian Basescu is being sued by the National Council for Combating Discrimination (CNCD) by three NGOs for "discriminatory and hateful statements" against Roma, made on a TV show. They also requested the intervention of the National Audiovisual Council in this case.

**Vladimir Tismaneanu fined by CNCD with 5,000 lei for a racist post about the "crows from Țândărei"**

The board of directors of the National Council for Combating Discrimination sanctioned, on Wednesday, the historian Vladimir Tismăneanu with 5,000 lei for posting on Facebook an image in which some crows appear with the message "Țândărei airport, all flights were canceled", considering that the deed constitutes discrimination.

**Vladimir Tismăneanu, racist post with "the crows from Țândărei". CNCD filed a complaint after the political scientist's message**

The president of CNCD, Asztalos Csaba, announced that the institution he leads will notify itself in the case of Vladimir Tismăneanu's post of an image in which some crows appear with the message "Tăndărei airport, all flights have been canceled".
